# Supplementary material for: Prognostic value of CD44 expression in renal cell carcinoma: a systematic review and meta-analysis
Source: PubMed Central journal article supplement (PMC4541415; doi:10.1038/srep13157), 2015-08-19
Supplement: srep13157-s1.pdf [file srep13157-s1.pdf]

**Prognostic value of CD44 expression in renal cell carcinoma: a systematic review and meta-analysis**

Xintao Li<sup>1#</sup>, Xin Ma<sup>#</sup>, Luyao Chen, Liangyou Gu, Yu Zhang, Fan Zhang, Yun Ouyang, Yu Gao, Qingbo Huang, Xu Zhang\*

Department of Urology, State Key Laboratory of Kidney Disease, PLA Medical School, Chinese People's Liberation Army General Hospital, Beijing, China.

# These authors contributed equally to this work.

\* Corresponding author

Supplemental table 1 PRISMA checklist

| Section/topic                      | #  | Checklist item                                                                                                                                                                                                                                                                                              | Reported on page # |
|------------------------------------|----|-------------------------------------------------------------------------------------------------------------------------------------------------------------------------------------------------------------------------------------------------------------------------------------------------------------|--------------------|
| <b>TITLE</b>                       |    |                                                                                                                                                                                                                                                                                                             |                    |
| Title                              | 1  | Identify the report as a systematic review, meta-analysis, or both.                                                                                                                                                                                                                                         | 1                  |
| <b>ABSTRACT</b>                    |    |                                                                                                                                                                                                                                                                                                             |                    |
| Structured summary                 | 2  | Provide a structured summary including, as applicable: background; objectives; data sources; study eligibility criteria, participants, and interventions; study appraisal and synthesis methods; results; limitations; conclusions and implications of key findings; systematic review registration number. | 2                  |
| <b>INTRODUCTION</b>                |    |                                                                                                                                                                                                                                                                                                             |                    |
| Rationale                          | 3  | Describe the rationale for the review in the context of what is already known.                                                                                                                                                                                                                              | 2,3                |
| Objectives                         | 4  | Provide an explicit statement of questions being addressed with reference to participants, interventions, comparisons, outcomes, and study design (PICOS).                                                                                                                                                  | 3,4                |
| <b>METHODS</b>                     |    |                                                                                                                                                                                                                                                                                                             |                    |
| Protocol and registration          | 5  | Indicate if a review protocol exists, if and where it can be accessed (e.g., Web address), and, if available, provide registration information including registration number.                                                                                                                               |                    |
| Eligibility criteria               | 6  | Specify study characteristics (e.g., PICOS, length of follow-up) and report characteristics (e.g., years considered, language, publication status) used as criteria for eligibility, giving rationale.                                                                                                      | 4,5                |
| Information sources                | 7  | Describe all information sources (e.g., databases with dates of coverage, contact with study authors to identify additional studies) in the search and date last searched.                                                                                                                                  | 4                  |
| Search                             | 8  | Present full electronic search strategy for at least one database, including any limits used, such that it could be repeated.                                                                                                                                                                               | 4                  |
| Study selection                    | 9  | State the process for selecting studies (i.e., screening, eligibility, included in systematic review, and, if applicable, included in the meta-analysis).                                                                                                                                                   | 4,5                |
| Data collection process            | 10 | Describe method of data extraction from reports (e.g., piloted forms, independently, in duplicate) and any processes for obtaining and confirming data from investigators.                                                                                                                                  | 5                  |
| Data items                         | 11 | List and define all variables for which data were sought (e.g., PICOS, funding sources) and any assumptions and simplifications made.                                                                                                                                                                       | 5                  |
| Risk of bias in individual studies | 12 | Describe methods used for assessing risk of bias of individual studies (including specification of whether this was done at the study or outcome level), and how this information is to be used in any data synthesis.                                                                                      | 5,6                |
| Summary measures                   | 13 | State the principal summary measures (e.g., risk ratio, difference in means).                                                                                                                                                                                                                               | 5,6                |

| Section/topic                 | #  | Checklist item                                                                                                                                                                                               | Reported on page #            |
|-------------------------------|----|--------------------------------------------------------------------------------------------------------------------------------------------------------------------------------------------------------------|-------------------------------|
| Synthesis of results          | 14 | Describe the methods of handling data and combining results of studies, if done, including measures of consistency (e.g., $I^2$ ) for each meta-analysis.                                                    | 5,6                           |
| Risk of bias across studies   | 15 | Specify any assessment of risk of bias that may affect the cumulative evidence (e.g., publication bias, selective reporting within studies).                                                                 | 6                             |
| Additional analyses           | 16 | Describe methods of additional analyses (e.g., sensitivity or subgroup analyses, meta-regression), if done, indicating which were pre-specified.                                                             | 6                             |
| <b>RESULTS</b>                |    |                                                                                                                                                                                                              |                               |
| Study selection               | 17 | Give numbers of studies screened, assessed for eligibility, and included in the review, with reasons for exclusions at each stage, ideally with a flow diagram.                                              | 6                             |
| Study characteristics         | 18 | For each study, present characteristics for which data were extracted (e.g., study size, PICOS, follow-up period) and provide the citations.                                                                 | Page 7, Table S2              |
| Risk of bias within studies   | 19 | Present data on risk of bias of each study and, if available, any outcome-level assessment (see Item 12).                                                                                                    | Table S3                      |
| Results of individual studies | 20 | For all outcomes considered (benefits or harms), present, for each study: (a) simple summary data for each intervention group and (b) effect estimates and confidence intervals, ideally with a forest plot. | Page 8-10, Table 1            |
| Synthesis of results          | 21 | Present results of each meta-analysis done, including confidence intervals and measures of consistency.                                                                                                      | Table 1                       |
| Risk of bias across studies   | 22 | Present results of any assessment of risk of bias across studies (see Item 15).                                                                                                                              | Page 10, Figure 3,4, Table S3 |
| Additional analysis           | 23 | Give results of additional analyses, if done (e.g., sensitivity or subgroup analyses, meta-regression [see Item 16]).                                                                                        | Page 10, Figure 5             |
| <b>DISCUSSION</b>             |    |                                                                                                                                                                                                              |                               |
| Summary of evidence           | 24 | Summarize the main findings including the strength of evidence for each main outcome; consider their relevance to key groups (e.g., health care providers, users, and policy makers).                        | 11                            |
| Limitations                   | 25 | Discuss limitations at study and outcome level (e.g., risk of bias), and at review level (e.g., incomplete retrieval of identified research, reporting bias).                                                | 13                            |
| Conclusions                   | 26 | Provide a general interpretation of the results in the context of other evidence, and implications for future research.                                                                                      | 13,14                         |
| <b>FUNDING</b>                |    |                                                                                                                                                                                                              |                               |
| Funding                       | 27 | Describe sources of funding for the systematic review and other support (e.g., supply of data); role of funders for the systematic review.                                                                   | 20                            |

Supplemental table 2 Characteristics of studies included in the meta-analysis

| No | Year | Author                        | Country       | Number | Follow-up time(months)                    | Cut-off score(H/L) | CD44 antibody | Tumor type    | Staining patterns   | Clinical stage(I,II/III,IV) | Furhm an grade      | Recurr ence      | Microva scular invasion | 5-DSS              | 5-DFS              | 5-OS                |
|----|------|-------------------------------|---------------|--------|-------------------------------------------|--------------------|---------------|---------------|---------------------|-----------------------------|---------------------|------------------|-------------------------|--------------------|--------------------|---------------------|
| 1  | 1998 | E de Alava(1)                 | Spain         | 58     | 36-79                                     | 1%,23/35           | CD44v6        | C,P,CH others | membrane            | H:12/11;<br>L:25/10         | H:9/14<br>L:30/5    | NA               | NA                      | NA                 | NA                 | H:11/12;<br>L:27/8  |
| 2  | 1999 | C. Fischer(2)                 | Germany       | 137    | 52.6(no progression)<br>18.7(progression) | 20%,27/10          | CD44s         | C             | NA                  | NA                          | NA                  | NA               | NA                      | NA                 | H:6/21;<br>L:67/43 | NA                  |
| 3  | 1999 | Michael Z.Gilcrease(3)        | United States | 43     | 43                                        | 5%,10/22           | CD44s         | C,P,CH        | membrane            | H:4/6;<br>L:13/9            | H:0/10;<br>L:10/12  | H:5/2;<br>L:0/13 | NA                      | NA                 | NA                 | NA                  |
|    |      |                               |               |        |                                           | 6/26               | CD44s         |               |                     | H:0/6;<br>L:17/9            | H:2/4;<br>L:8/28    | H:2/1;<br>L:3/14 | NA                      | NA                 | NA                 | NA                  |
|    |      |                               |               |        |                                           | 2/30               | CD44v3        |               |                     | H:0/2;<br>L:17/13           | H:0/2;<br>L:10/20   | H:0/0;<br>L:5/15 | NA                      | NA                 | NA                 | NA                  |
|    |      |                               |               |        |                                           | 4/28               | CD44v6        |               |                     | H:1/3;<br>L:16/12           | H:2/2;<br>L:8/20    | H:1/1;<br>L:4/14 | NA                      | NA                 | NA                 | NA                  |
| 4  | 1999 | Valerie Paradis(4)            | France        | 66     | 54                                        | 1%,32/34           | CD44H6        | C             | Membrane, Cytoplasm | NA                          | H:8/24;<br>L:18/16  | NA               | NA                      | NA                 | NA                 | H:20/12;<br>L:32/2  |
|    |      |                               |               |        |                                           | 1%,2/64            | CD44v6        |               |                     | NA                          | NA                  | NA               | NA                      | NA                 | NA                 | NA                  |
| 5  | 2000 | N.LI(5)                       | Japan         | 60     | 48.6                                      | 20%,22/38          | CD44v10       | C,G           | Cytoplasm           | H:11/11;<br>L:32/6          | NA                  | NA               | NA                      | H:12/10;<br>L:36/2 | NA                 | NA                  |
| 6  | 2000 | Laurent Daniel(6)             | France        | 95     | 58.1                                      | 1%,26/69           | CD44          | C             | Membrane, cytoplasm | NA                          | H:16/10;<br>L:67/2  | NA               | NA                      | NA                 | H:22/4;<br>L:66/3  | NA                  |
| 7  | 2001 | Nathalie Rioux(7)<br>Leclercq | France        | 73     | 52                                        | 20%,50/23          | CD44s         | C             | Membrane, cytoplasm | NA                          | NA                  | NA               | NA                      | H:16/34;<br>L:21/2 | NA                 | NA                  |
| 8  | 2002 | Shengtang Wu(8)               | China         | 67     | >60                                       | 0%,62/5            | CD44v5        | C,G,S         | Membrane            | NA                          | H:27/35;<br>L:0/5   | NA               | NA                      | NA                 | NA                 | H:43/19;<br>L:1/4   |
| 9  | 2002 | A.Bamias(9)                   | Greece        | 92     | 41.5                                      | 10%,48/44          | CD44s         |               | Membrane, cytoplasm | NA                          | H:32/16;<br>L:32/12 | NA               | NA                      | NA                 | NA                 | H:31/17;<br>L:30/14 |

|    |      |                                    |                  |     |      |               |            |                |                                    |                     |                         |                   |                    |                        |                             |                     |
|----|------|------------------------------------|------------------|-----|------|---------------|------------|----------------|------------------------------------|---------------------|-------------------------|-------------------|--------------------|------------------------|-----------------------------|---------------------|
| 10 | 2004 | Ksenija(10)                        | Croatia          | 173 | 85   | 1%,70/10<br>3 | CD44s      | C              | Membrane,<br>cytoplasm             | H:41/28;<br>L:79/25 | H:23/4<br>7;<br>L:76/27 | NA                | NA                 | NA                     | NA                          | H:31/39;<br>L:66/37 |
|    |      |                                    |                  |     |      | 11/162        | CD44v<br>5 | C              | Membrane,<br>cytoplasm             | NA                  | NA                      | NA                | NA                 | NA                     | NA                          | NA                  |
|    |      |                                    |                  |     |      | 28/145        | CD44v<br>6 | C              | Membrane,<br>cytoplasm             | NA                  | NA                      | NA                | NA                 | NA                     | NA                          | NA                  |
| 11 | 2004 | E. Yildiz(11)                      | Turkey           | 42  | 48   | 20%,20/2<br>2 | CD44       | C              | Membrane,<br>cytoplasm             | NA                  | NA                      | NA                | H:18/2;<br>L:5/17  | H:2/18;<br>L:18/4      | NA                          | NA                  |
| 12 | 2005 | Koviljka<br>Matusan(12)            | Croatia          | 38  |      | >1%,22/1<br>6 | CD44s      | P              | Membrane,<br>cytoplasm             | H:21/1;<br>L:11/5   | H:14/8;<br>L:12/4       | NA                | NA                 | NA                     | NA                          | NA                  |
|    |      |                                    |                  |     |      | 12/26         | CD44v<br>6 | P              | Membrane,<br>cytoplasm             | NA                  | NA                      | NA                | NA                 | NA                     | NA                          | NA                  |
| 13 | 2006 | Mahmood<br>Kabiri(13)              | Iran             | 46  | 31.3 | 5%,15/31      | CD44       | C,P,S,P,<br>CH |                                    | NA                  | NA                      | NA                | NA                 | NA                     | NA                          | H:9/6;<br>L:28/3    |
| 14 | 2007 | Ossam<br>W.Tawfik(14)              | United<br>States | 62  | 22   | 1%,20/42      | CD44       | C,CH,P         | Cytoplasm                          | NA                  | NA                      | NA                | NA                 | NA                     | NA                          | H:10/10;<br>L:21/21 |
| 15 | 2008 | So<br>Lim(15)                      | Dug<br>Korea     | 86  | 46   | 5%,38/48      | CD44s      | C,P,CH         | Membrane,<br>cytoplasm             | H:16/22;<br>L:24/24 | H:6/32;<br>L:23/25      | NA                | NA                 | NA                     | H:27/1<br>1;<br>L:31/1<br>7 | NA                  |
| 16 | 2012 | Byung<br>Jeong(16)                 | Joo<br>Korea     | 110 | 60   | 50%,18/9<br>2 | CD44       | C              | Membrane<br>cytoplasm              | NA                  | H:11/7;<br>L:80/12      | H:11/7;<br>L:8/84 | NA                 | H:10/8;<br>L:87/5      | H:7/11;<br>L:84/8           | H:9/9;<br>L:81/11   |
| 17 | 2012 | Walter<br>Henriques<br>dacosta(17) | Brazil           | 99  | 43   | 50%,42/5<br>7 | CD44s      | C              | Membrane,<br>Cytoplasm,<br>nucleus | H:17/23;<br>L:43/16 | H:23/1<br>9;<br>L:46/11 | NA                | H:11/29;<br>L:5/54 | H:27/1<br>3;<br>L:52/7 | H:26/1<br>6;<br>L:45/1<br>2 | NA                  |
| 18 | 2013 | Yanhui<br>Zhang(18)                | China            | 110 | 64.7 | 1%,30/80      | CD44       | C,P,CH         | membrane                           | H:8/22;<br>L:49/31  | H:6/24;<br>L:55/25      | NA                | NA                 | NA                     | NA                          | NA                  |
| 19 | 2014 | Jun Qin(19)                        | China            | 75  | 63   | 25%,35/4<br>0 | CD44s      | C              | Membrane,<br>cytoplasm             | NA                  | H:15/2<br>0;<br>L:34/6  | NA                | NA                 | NA                     | NA                          | H:14/9;<br>L:17/3   |
| 20 | 2014 | Shuji<br>Mikami(20)                | Japan            | 120 |      | 11%,27/9<br>3 | CD44       | C              | Membrane                           | NA                  | NA                      | NA                | NA                 | NA                     | H:8/19;<br>L:84/9           | H:13/14;<br>L:83/10 |

Supplemental table 3 Heterogeneity test and publication bias analyses among studies included

|                           | Clinical Stage<br>(I+II vs. III+IV) |                                 |                  |                | Recurrence<br>(positive vs.negative) |                                 |                  |                | MVI<br>(positive vs.negative) |                                 |                  |                | Furhamn Grade<br>(grade I+II vs.grade III+IV) |                                 |                  |                | 5-Overall Survival<br>(survive vs. death) |                                 |                  |                | 5-Disease Specific Survival<br>(survive vs. death) |                                 |                  |                | 5-Disease Free Survival<br>(survive vs. death) |                                 |                  |                |
|---------------------------|-------------------------------------|---------------------------------|------------------|----------------|--------------------------------------|---------------------------------|------------------|----------------|-------------------------------|---------------------------------|------------------|----------------|-----------------------------------------------|---------------------------------|------------------|----------------|-------------------------------------------|---------------------------------|------------------|----------------|----------------------------------------------------|---------------------------------|------------------|----------------|------------------------------------------------|---------------------------------|------------------|----------------|
|                           | Heterogeneity                       |                                 | Publication bias |                | Heterogeneity                        |                                 | Publication bias |                | Heterogeneity                 |                                 | Publication bias |                | Heterogeneity                                 |                                 | Publication bias |                | Heterogeneity                             |                                 | Publication bias |                | Heterogeneity                                      |                                 | Publication bias |                | Heterogeneity                                  |                                 | Publication bias |                |
|                           | P <sup>a</sup>                      | I <sup>2</sup> (%) <sup>b</sup> | P <sup>c</sup>   | P <sup>d</sup> | P <sup>a</sup>                       | I <sup>2</sup> (%) <sup>b</sup> | P <sup>c</sup>   | P <sup>d</sup> | P <sup>a</sup>                | I <sup>2</sup> (%) <sup>b</sup> | P <sup>c</sup>   | P <sup>d</sup> | P <sup>a</sup>                                | I <sup>2</sup> (%) <sup>b</sup> | P <sup>c</sup>   | P <sup>d</sup> | P <sup>a</sup>                            | I <sup>2</sup> (%) <sup>b</sup> | P <sup>c</sup>   | P <sup>d</sup> | P <sup>a</sup>                                     | I <sup>2</sup> (%) <sup>b</sup> | P <sup>c</sup>   | P <sup>d</sup> | P <sup>a</sup>                                 | I <sup>2</sup> (%) <sup>b</sup> | P <sup>c</sup>   | P <sup>d</sup> |
| <b>Over all</b>           | 0.002                               | 71.8                            | 0.368            | 0.337          | 0.47                                 | 0                               | 1                | 0.821          | 0.755                         | 0                               | 1                |                | 0.001                                         | 65.2                            | 0.436            | 0.194          | 0.23                                      | 24.6                            | 0.602            | 0.457          | 0                                                  | 83.7                            | 0.308            | 0.125          | 0                                              | 86.3                            | 0.26             | 0.045          |
| <b>Geographic area</b>    |                                     |                                 |                  |                |                                      |                                 |                  |                |                               |                                 |                  |                |                                               |                                 |                  |                |                                           |                                 |                  |                |                                                    |                                 |                  |                |                                                |                                 |                  |                |
| 1.Asia                    | 0.081                               | 67.1                            | 0.317            | NA             | NA                                   | NA                              | NA               | NA             | NA                            | NA                              | NA               | NA             | 0.065                                         | 58.5                            | 0.308            | 0.101          | 0.711                                     | 0                               | 0.734            | 0.567          | NA                                                 | NA                              | NA               | NA             | 0                                              | 91.3                            | 0.296            | 0.09           |
| 2.Non-Asian               | 0.002                               | 75.6                            | 0.806            | 0.582          | NA                                   | NA                              | NA               | NA             | NA                            | NA                              | NA               | NA             | 0.013                                         | 63                              | 0.548            | 0.742          | 0.112                                     | 46.7                            | 1                | 0.928          | 0                                                  | 83.7                            | 0.602            | 0.291          | 0.006                                          | 80.2                            | 0.296            | 0.066          |
| <b>Staining pattern</b>   |                                     |                                 |                  |                |                                      |                                 |                  |                |                               |                                 |                  |                |                                               |                                 |                  |                |                                           |                                 |                  |                |                                                    |                                 |                  |                |                                                |                                 |                  |                |
| 1.membrane                | 0.34                                | 7.3                             | 0.602            | 0.59           | NA                                   | NA                              | NA               | NA             | NA                            | NA                              | NA               | NA             | 0.025                                         | 68.1                            | 1                | 0.673          | NA                                        | NA                              | NA               | NA             | NA                                                 | NA                              | NA               | NA             | 0                                              | 95.8                            | 0.317            | NA             |
| 2.cytoplasm               | NA                                  | NA                              | NA               | NA             | NA                                   | NA                              | NA               | NA             | NA                            | NA                              | NA               | NA             | NA                                            | NA                              | NA               | NA             | NA                                        | NA                              | NA               | NA             | NA                                                 | NA                              | NA               | NA             | NA                                             | NA                              | NA               | NA             |
| 3.membrane and cytoplasm  | 0.006                               | 76.1                            | 1                | 0.92           | NA                                   | NA                              | NA               | NA             | NA                            | NA                              | NA               | NA             | 0.005                                         | 67.5                            | 0.548            | 0.159          | 0.209                                     | 30.2                            | 0.452            | 0.174          | NA                                                 | NA                              | NA               | NA             | 0.008                                          | 79.4                            | 0.602            | 0.442          |
| <b>Cutoff of staining</b> |                                     |                                 |                  |                |                                      |                                 |                  |                |                               |                                 |                  |                |                                               |                                 |                  |                |                                           |                                 |                  |                |                                                    |                                 |                  |                |                                                |                                 |                  |                |
| 1.<20%                    | 0.001                               | 79.8                            | 0.221            | 0.12           | NA                                   | NA                              | NA               | NA             | NA                            | NA                              | NA               | NA             | 0.277                                         | 21.6                            | 0.707            | 0.202          | 0.123                                     | 44.9                            | 0.806            | 0.953          | NA                                                 | NA                              | NA               | NA             | 0                                              | 94.3                            | 1                | NA             |
| 2.>=20%                   | 0.195                               | 40.5                            | 1                | NA             | NA                                   | NA                              | NA               | NA             | NA                            | NA                              | NA               | NA             | 0                                             | 78.4                            | 0.462            | 0.436          | 0.589                                     | 0                               | 0.734            | 0.195          | NA                                                 | NA                              | NA               | NA             | 0                                              | 84.1                            | 0.308            | 0.006          |
| <b>Sample size</b>        |                                     |                                 |                  |                |                                      |                                 |                  |                |                               |                                 |                  |                |                                               |                                 |                  |                |                                           |                                 |                  |                |                                                    |                                 |                  |                |                                                |                                 |                  |                |
| <58.5                     | 0.006                               | 39.6                            | 0.296            | 0.095          | NA                                   | NA                              | NA               | NA             | NA                            | NA                              | NA               | NA             | 0.067                                         | 58.2                            | 1                | 0.912          | 0.44                                      | 0                               | 0.806            | 0.692          | 0.085                                              | 66.3                            | 1                | 0              | NA                                             | NA                              | NA               | NA             |
| ≥58.5                     | 0.174                               | 80.5                            | 0.308            | 0.331          | NA                                   | NA                              | NA               | NA             | NA                            | NA                              | NA               | NA             | 0.001                                         | 72.1                            | 0.23             | 0.039          | 0.079                                     | 55.7                            | 0.308            | 0.214          | 0.255                                              | 22.8                            | 1                | 0              | NA                                             | NA                              | NA               | NA             |
| <b>Follow time(month)</b> |                                     |                                 |                  |                |                                      |                                 |                  |                |                               |                                 |                  |                |                                               |                                 |                  |                |                                           |                                 |                  |                |                                                    |                                 |                  |                |                                                |                                 |                  |                |
| <68.5                     | 0.329                               | 12.7                            | 0.734            | 0.437          | NA                                   | NA                              | NA               | NA             | NA                            | NA                              | NA               | NA             | 0.019                                         | 66                              | 0.462            | 0.418          | 0.348                                     | 0                               | 1                | 0.826          | 0.001                                              | 90.7                            | 1                | 0              | 0                                              | 91.7                            | 0.317            | 0              |
| ≥68.5                     | 0.06                                | 71.7                            | 1                | 0              | NA                                   | NA                              | NA               | NA             | NA                            | NA                              | NA               | NA             | 0.1                                           | 48.6                            | 0.462            | 0.195          | 0.739                                     | 5.4                             | 0.806            | 0.16           | 0.086                                              | 66                              | 1                | 0              | 0.096                                          | 63.8                            | 0.602            | 0.034          |

a P for heterogeneity within each subgroup.

b Proportion of between-study heterogeneity accounting for total heterogeneity.

c P values of Begg's test.

d P values of Egger's test.

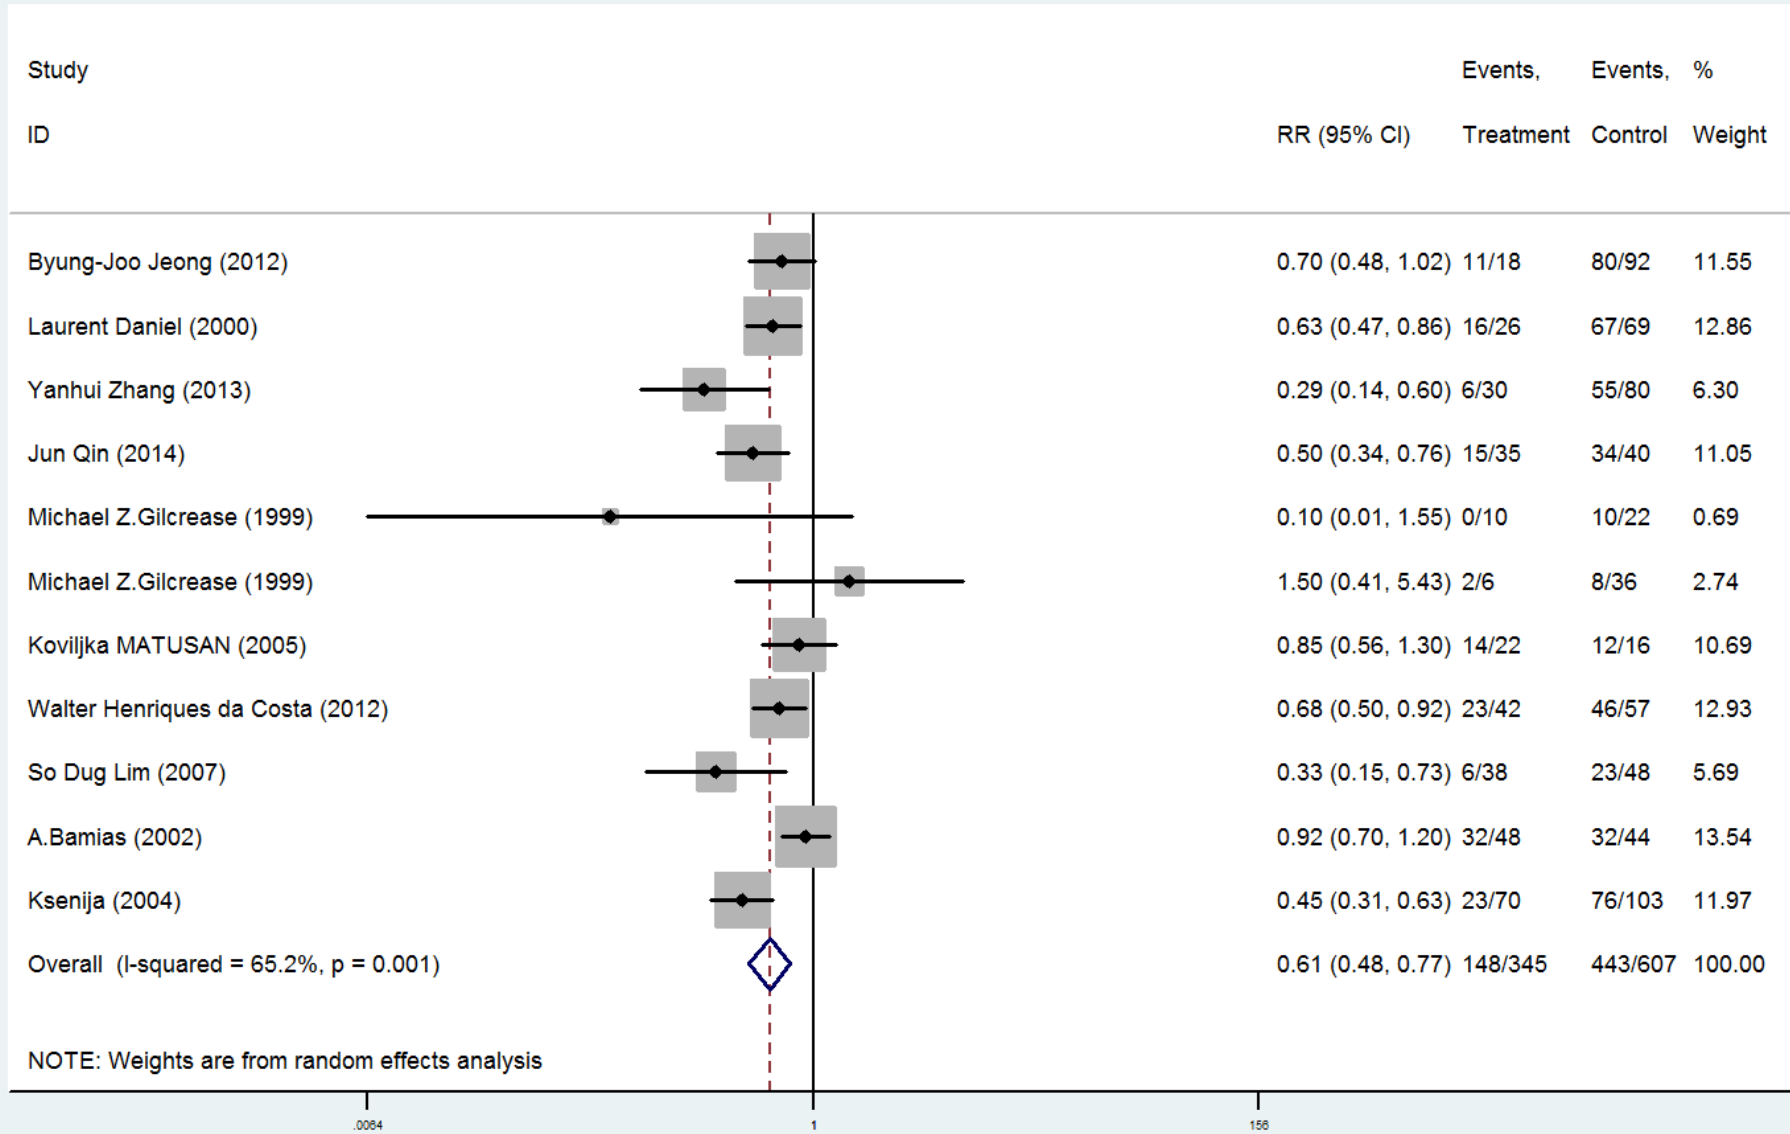

Supplemental figure 1 CD44 expression and Furhman grade

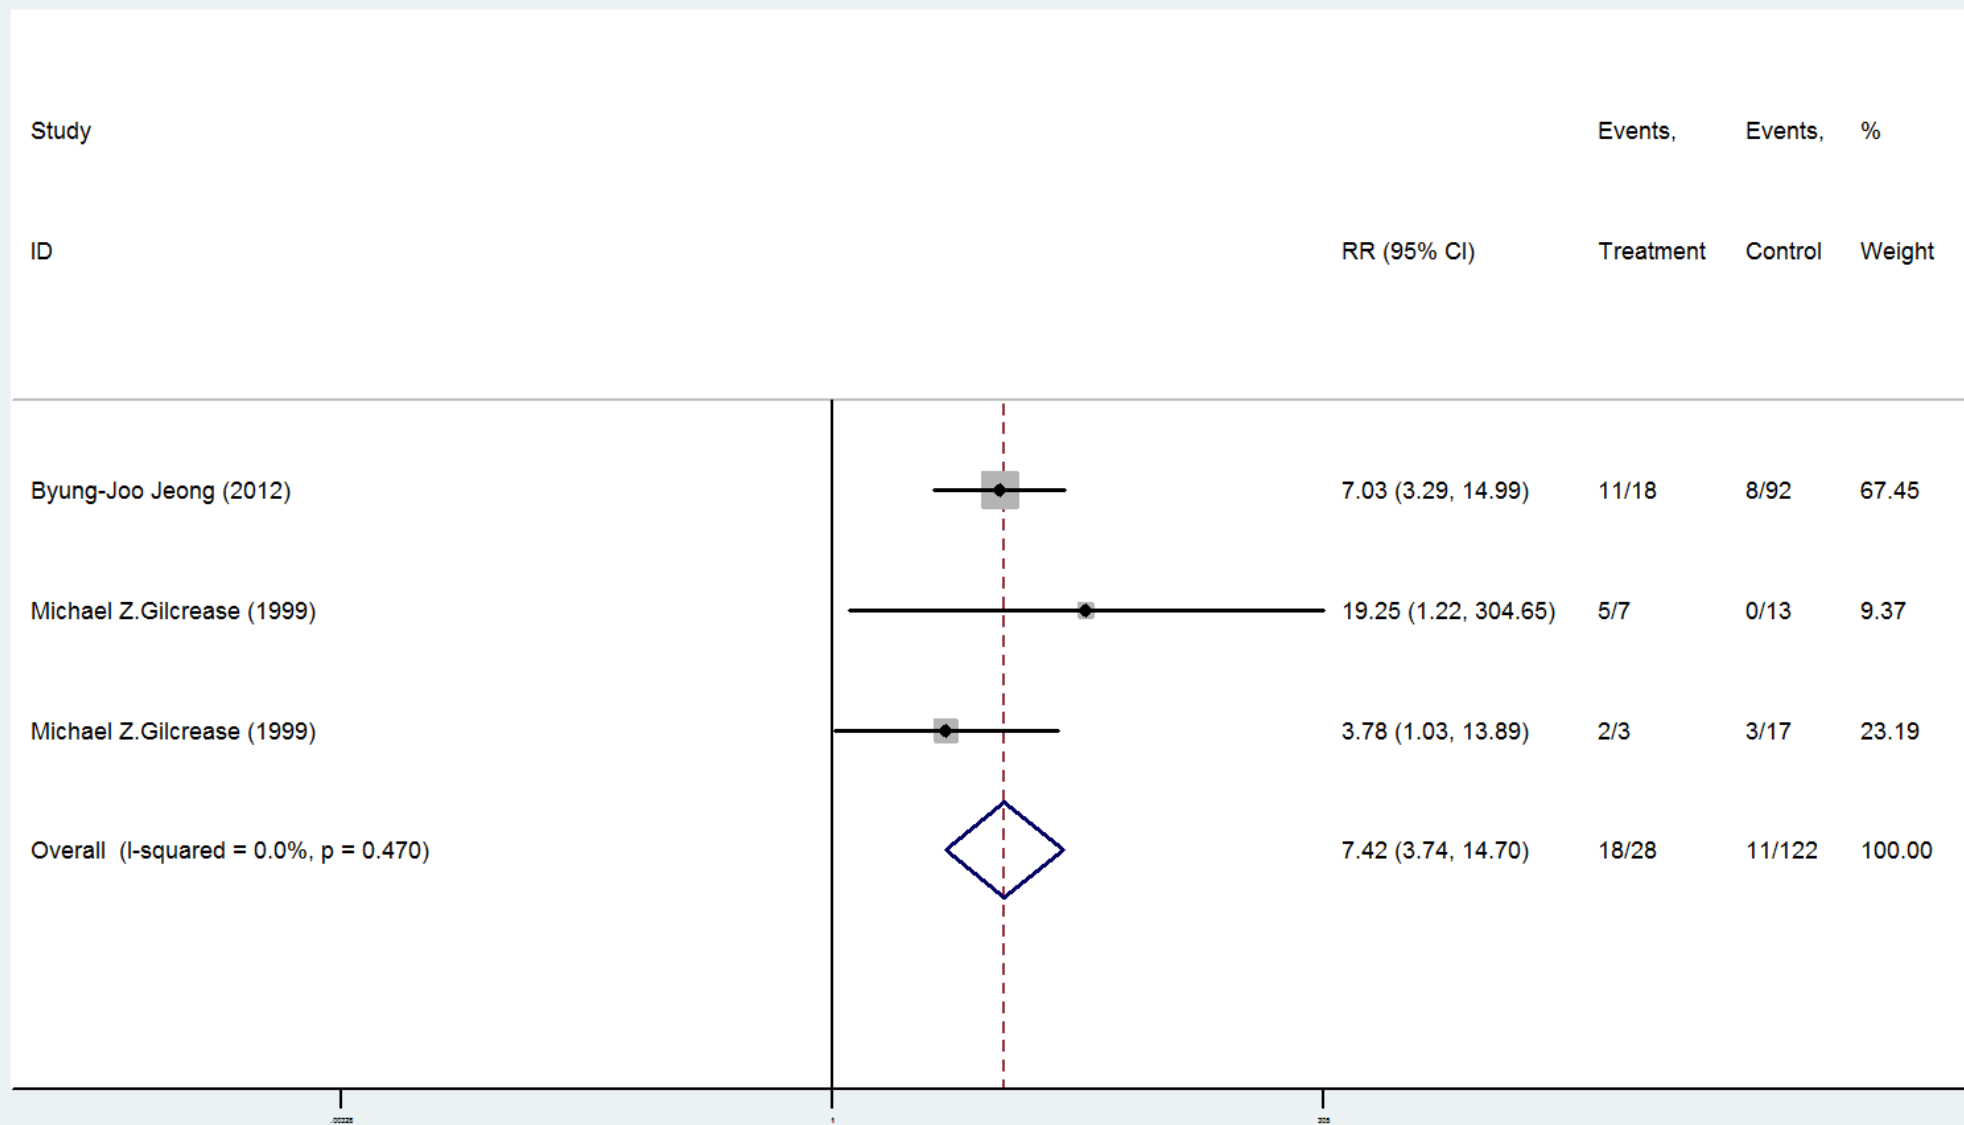

Supplemental figure 2 CD44 expression and tumor recurrence



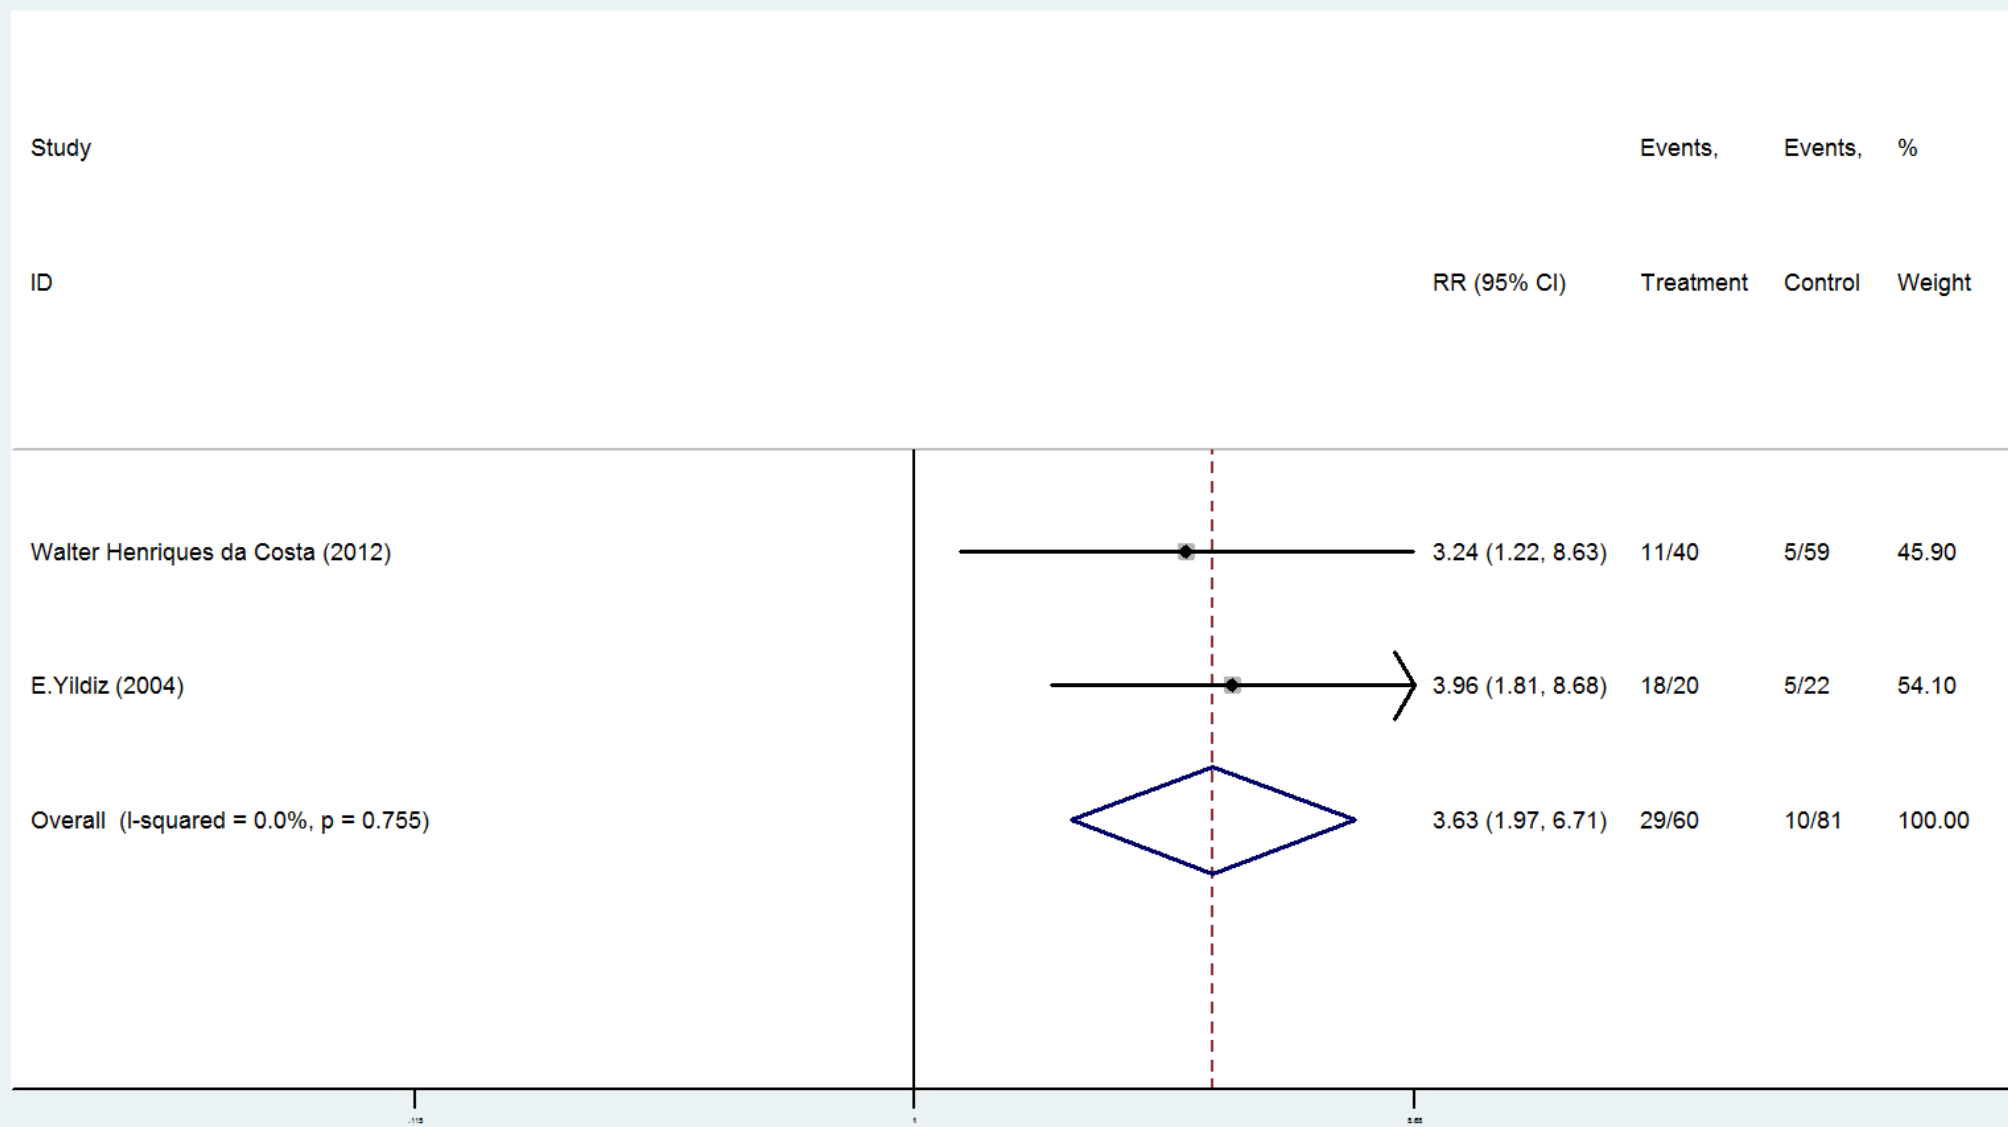

Supplemental figure 3 CD44 expression and tumor MVI

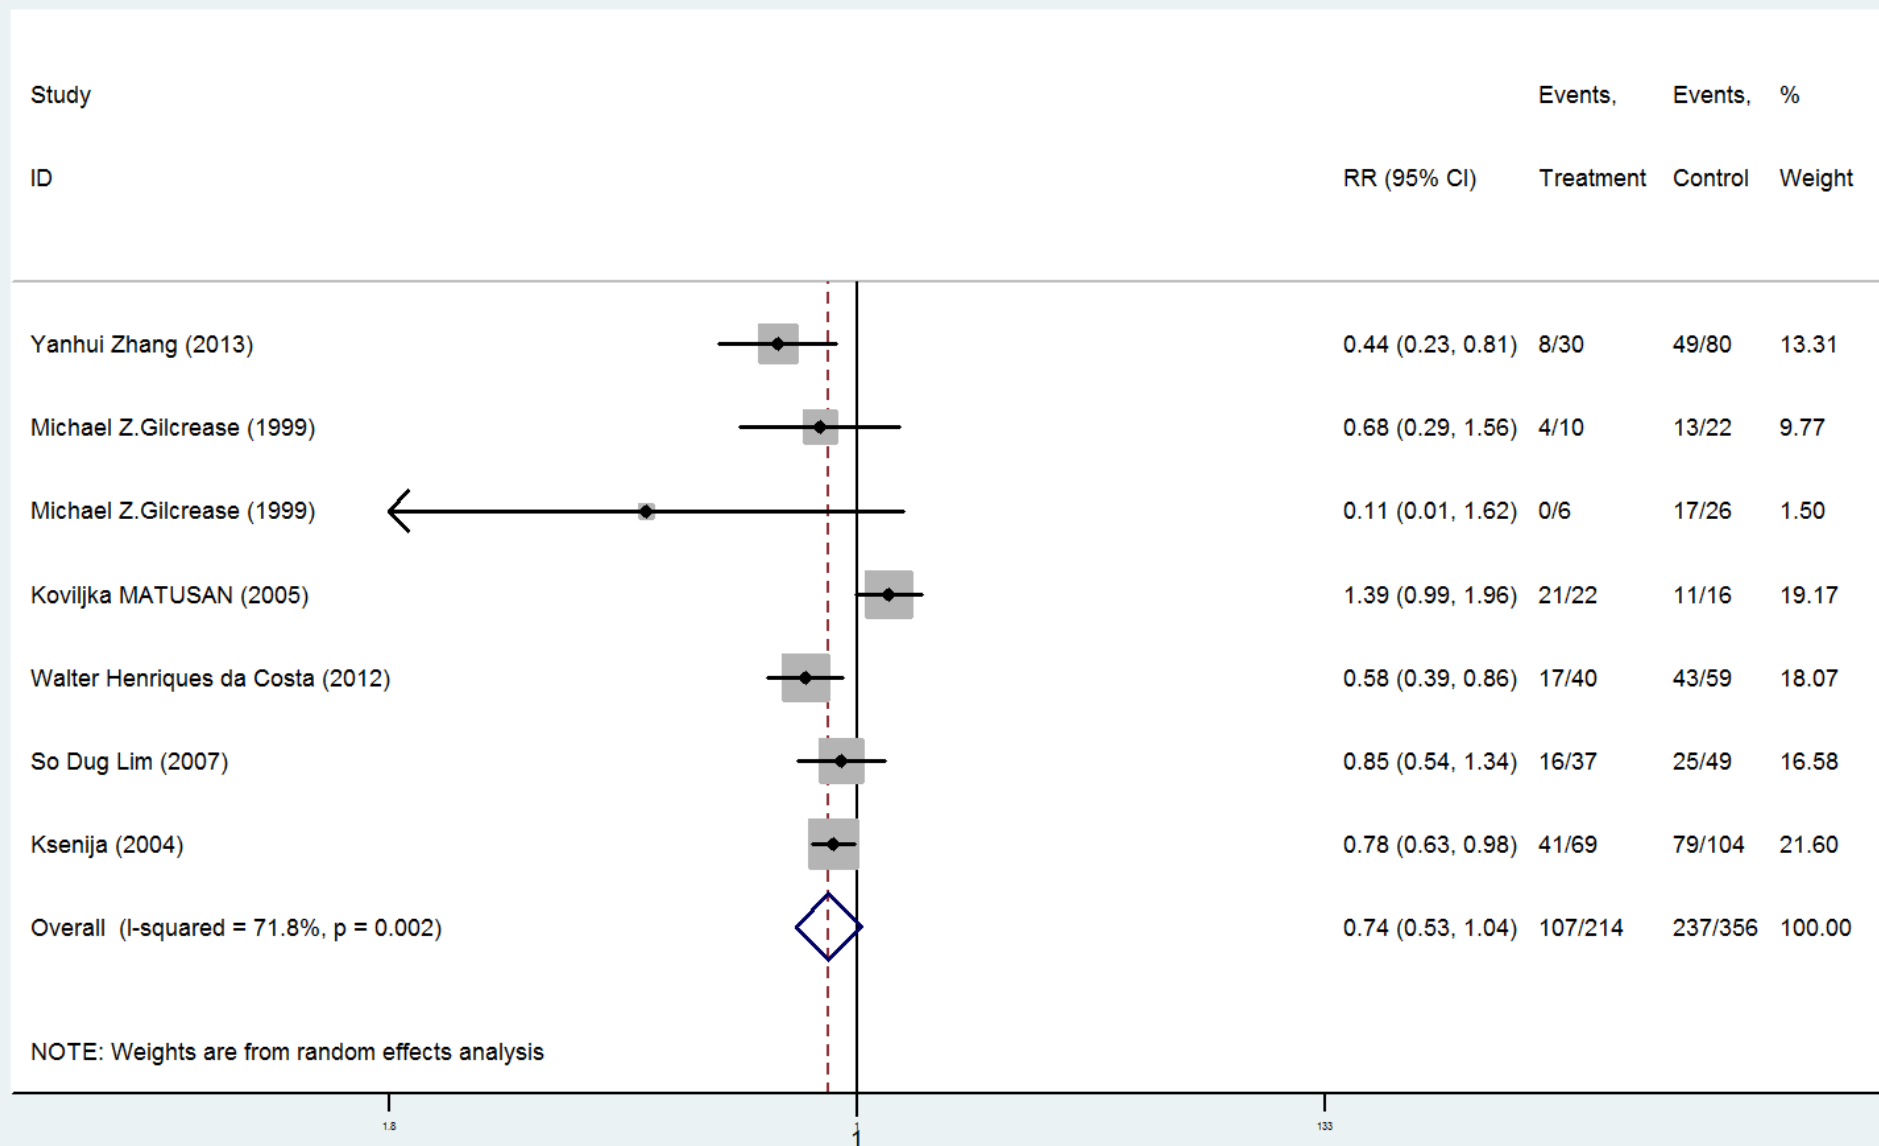

Supplemental figure 4 CD44 expression and tumor clinical stage

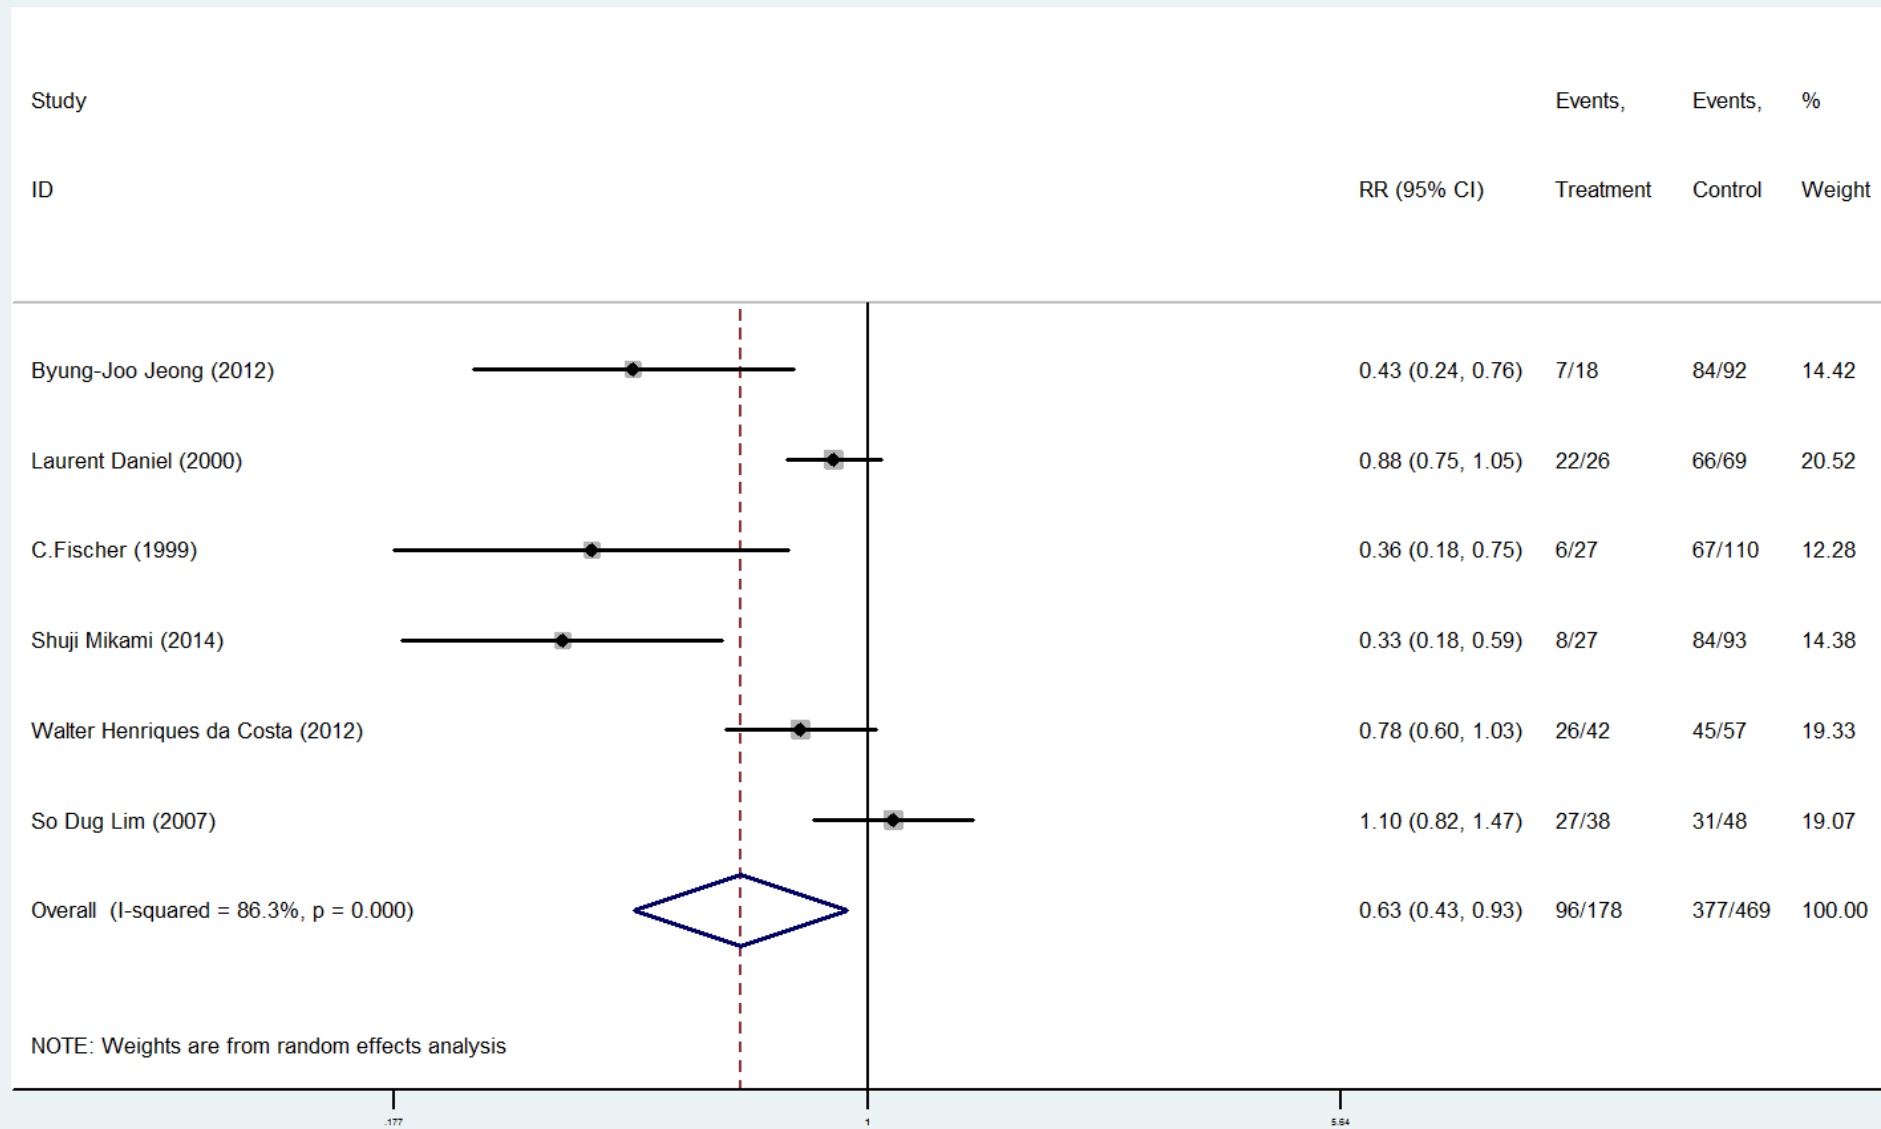

Supplemental figure 5 CD44 expression and 5-year DFS

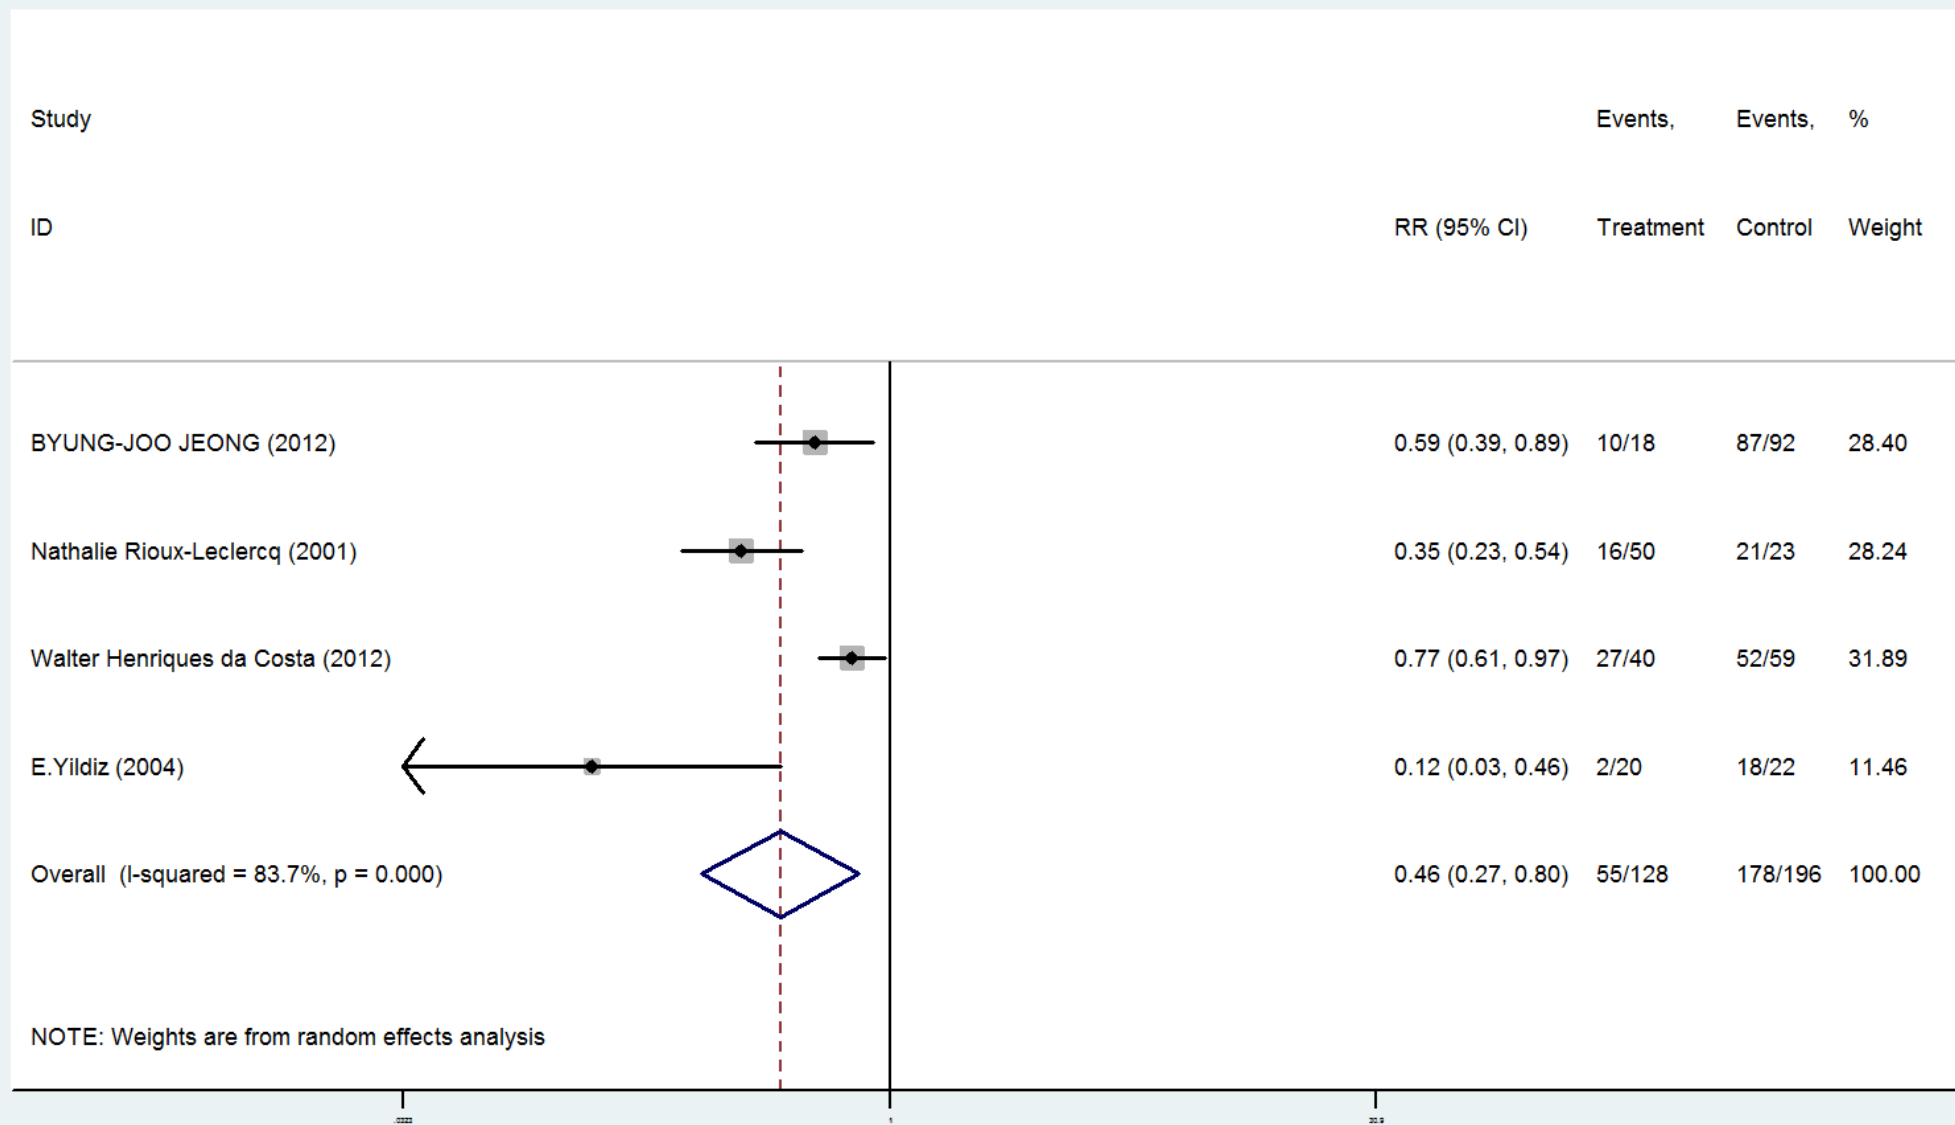

Supplemental figure 6 CD44 expression and 5-year DSS

## References

- 1 de Alava, E., Panizo, A., Sola, I., Rodriguez-Rubio, F. I. & Pardo-Mindan, F. J. CD44v6 expression is related to progression in renal epithelial tumours. *Histopathology* **33**, 39-45 (1998).
- 2 Fischer, C. *et al.* CD44s, E-cadherin and PCNA as markers for progression in renal cell carcinoma. *Anticancer research* **19**, 1513-1517 (1999).
- 3 Gilcrease, M. Z. *et al.* Correlation of CD44S expression in renal clear cell carcinomas with subsequent tumor progression or recurrence. *Cancer* **86**, 2320-2326 (1999).
- 4 Paradis, V. *et al.* CD44 is an independent prognostic factor in conventional renal cell carcinomas. *The Journal of urology* **161**, 1984-1987 (1999).
- 5 Li, N. *et al.* Analysis of CD44 isoform v10 expression and its prognostic value in renal cell carcinoma. *BJU international* **85**, 514-518 (2000).
- 6 Daniel, L. *et al.* CD44s and CD44v6 expression in localized T1-T2 conventional renal cell carcinomas. *The Journal of pathology* **193**, 345-349, doi:10.1002/1096-9896(2000)9999:9999<::aid-path817>3.0.co;2-h (2001).
- 7 Rioux-Leclercq, N. *et al.* Clinical significance of cell proliferation, microvessel density, and CD44 adhesion molecule expression in renal cell carcinoma. *Human pathology* **32**, 1209-1215 (2001).
- 8 Wu, S. T. *et al.* Correlation of CD44v5 expression with invasiveness and prognosis in renal cell carcinoma. *Journal of the Formosan Medical Association = Taiwan yi zhi* **102**, 229-233 (2003).
- 9 Bamias, A. *et al.* Prognostic significance of CA 125, CD44, and epithelial membrane antigen in renal cell carcinoma. *Urology* **62**, 368-373 (2003).
- 10 Lucin, K., Matusan, K., Dordevic, G. & Stipic, D. Prognostic significance of CD44 molecule in renal cell carcinoma. *Croatian medical journal* **45**, 703-708 (2004).
- 11 Yildiz, E. *et al.* Prognostic value of the expression of Ki-67, CD44 and vascular endothelial growth factor, and microvessel invasion, in renal cell carcinoma. *BJU international* **93**, 1087-1093, doi:10.1111/j.1464-410X.2004.04786.x (2004).
- 12 Matusan, K., Dordevic, G., Mozetic, V. & Lucin, K. Expression of osteopontin and CD44 molecule in papillary renal cell tumors. *Pathology oncology research : POR* **11**, 108-113, doi:Paor.2005.11.2.0108 (2005).
- 13 Mahnood Kabiri, M. M. S., Diana Taheri, Ali Chehrei. Prognostic value of CD44 in renal cell carcinoma. *J Res Med Sci* **11**, 5 (2006).
- 14 Tawfik, O. W. *et al.* Prognostic significance of CD44, platelet-derived growth factor receptor alpha, and cyclooxygenase 2 expression in renal cell carcinoma. *Archives of pathology & laboratory medicine* **131**, 261-267, doi:10.1043/1543-2165(2007)131[261:psocpg]2.0.co;2 (2007).
- 15 Lim, S. D., Young, A. N., Paner, G. P. & Amin, M. B. Prognostic role of CD44 cell adhesion molecule expression in primary and metastatic renal cell carcinoma: a clinicopathologic study of 125 cases. *Virchows Archiv : an international journal of pathology* **452**, 49-55, doi:10.1007/s00428-007-0530-4 (2008).
- 16 Jeong, B. J. *et al.* CD44 is associated with tumor recurrence and is an independent poor prognostic factor for patients with localized clear cell renal cell carcinoma after nephrectomy. *Experimental and therapeutic medicine* **3**, 811-817, doi:10.3892/etm.2012.505 (2012).
- 17 Costa, W. H., Rocha, R. M., Cunha, I. W., Guimaraes, G. C. & Zequi Sde, C. Immunohistochemical expression of CD44s in renal cell carcinoma lacks independent prognostic significance. *International braz j urol : official journal of the Brazilian Society of Urology* **38**, 456-465 (2012).
- 18 Zhang, Y. *et al.* Clinical significances and prognostic value of cancer stem-like cells markers and vasculogenic mimicry in renal cell carcinoma. *Journal of surgical oncology* **108**, 414-419, doi:10.1002/jso.23402 (2013).
- 19 Qin, J. *et al.* Concurrent CD44s and STAT3 expression in human clear cell renal cellular carcinoma and its impact on survival. *International journal of clinical and experimental pathology* **7**, 3235-3244 (2014).
- 20 Mikami, S. *et al.* Expression of TNF-alpha and CD44 is implicated in poor prognosis, cancer cell invasion, metastasis and resistance to the sunitinib treatment in clear cell renal cell carcinomas. *International journal of cancer. Journal international du cancer*, doi:10.1002/ijc.29137 (2014).
